# Supplementary material for: Real-time reverse transcription loop-mediated isothermal amplification for rapid detection of SARS-CoV-2
Source: PeerJ. 2020 Jun 3;8:e9278. doi: 10.7717/peerj.9278 (PMC7275676; doi:10.7717/peerj.9278)
Supplement: Supplemental Information 6 [file peerj-08-9278-s006.xlsx]

## Sheet: Sheet1
Supplementary Table 2: Real time RT-PCR and RT-LAMP results.
							The limit of detection of qRT-PCR and RT-LAMP
Patient Sample No.	qRT-PCR (Ct-value)	RT-LAMP (min)	Patient Sample No.	qRT-PCR (Ct-value)	RT-LAMP (min)		RNA copy	qRT-PCR	qRT-PCR	RT-LAMP	RT-LAMP	RT-LAMP	RT-LAMP
N2141	19.81	23.18	N2540	-	-		(cp/μL)	(Ct-value)	(Ct-value)	(without HNB)(min)	(without HNB)(min)	(with HNB)(min)	(with HNB)(min)
N2096	21.1	23	N2448	-	-		10	20.8	20.2	19	18.7	18.3	19.5
N2106	21.34	22	N2556	-	-		5	31.6	30.4	23.48	25.8	24.6	25.2
N2110	27.04	26	N2564	-	-		2	-	-	29.5	30	29.8	30.2
N2111	30.27	27	N2509	-	-		1	-	-	-	-	-	-
N1932	30.41	28	N2517	-	-		0.1	-	-	-	-	-	-
N1962	24.14	29	N2525	-	-
N2016	25.39	28.48	N2533	-	-
N2059	24.31	29.24	N2451	-	-
N2054	24.14	23.48	N2557	-	-
N2117	24.12	26.42	N2565	-	-
N1966	23.04	28.36	N2526	-	-
N1955	30.14	30.06	N2534	-	-
N1971	24.39	30.54	N2197	-	-
N1888	26.98	30	N2550	-	-
N1982	22.3	25.42	N2566	-	-
N1893	29.92	30	N2519	-	-
N1908	25.22	26.24	N2527	-	-
N1819	30.1	30	N2535	-	-
N1852	27.13	28.18	N2543	-	-
N1763	19.13	19.3	N2164	-	-
N1515	28.6	30.3	N2165	-	-
N1552	28.69	27.06	N2166	-	-
N1578	27.16	30.18	N2198	-	-
N1495	18.52	23.3	N2168	-	-
N1856	18.94	23.48	N2169	-	-
N1934	24.45	28.3	N2171	-	-
N1961	22.56	30	N2173	-	-
N2007	23.42	30	N2174	-	-
N2040	22.68	24.3	N2175	-	-
N1590	27.58	30	N2177	-	-
N1938	25.32	27.3	N2178	-	-
N1746	25.17	29.48	N2199	-	-
N1939	29.31	30	N2181	-	-
N1802	32.07	30	N2182	-	-
N2253	21.05	20	N2183	-	-
N2516	24.73	23.4	N2186	-	-
N2529	28.3	29.5	N2187	-	-
N2563	20.37	21.06	N2188	-	-
N2170	28.48	30	N2190	-	-
N2176	20.39	20	N2191	-	-
N2185	21.2	20.1	N2192	-	-
N2206	20.81	19	HCoV-OC43	-	-
N2259	29.06	20.2	SARS-CoV	-	-
N2231	29.02	29.5	Adenovirus	-	-
N2252	27.46	30	Human metapneumovirus	-	-
N2254	29.05	28.01	A/H1pdm2009	-	-
			A/H3	-	-
			Influenza B virus	-	-
			Parainfluenza virus 3	-	-
			Rhinovirus A	-	-
			Respiratory syncytial virus B	-	-
			Enterovirus D6	-	-
